# Supplementary material for: The impact of visuospatial perception on distance judgment and depth perception in an Augmented Reality environment in patients after stroke: an exploratory study
Source: PubMed Central journal article supplement (PMC8379833; doi:10.1186/s12984-021-00920-5), 2021-08-21
Supplement: 12984_2021_920_MOESM1_ESM.pdf [file 12984_2021_920_MOESM1_ESM.pdf]

Effects of stereovision on completion times of tasks in the Augmented Reality environment.

|      | Patients     |                | Healthy Subjects |                |
|------|--------------|----------------|------------------|----------------|
|      | stereonormal | stereoimpaired | stereonormal     | stereoimpaired |
| PMT  | 18.9 (7.7)   | 21.2 (14.4)    | 11.8 (6.4)       | 12.6 (5.8)     |
| AFCT | 12.6 (6.6)   | 11.7 (3.9)     | 7.8 (3.3)        | 6.9 (4.8)      |
| PT   | 7.3 (2.6)    | 8.4 (3.8)      | 3.6 (1.6)        | 4.2 (1.8)      |
| 3DDT | 6.0 (3.1)*   | 10.3 (4.8)     | 3.2 (1.2)*       | 11.1 (18.9)    |

*Note.* Cells represent *mean (SD)*. \* indicate a significant difference to the corresponding stereoimpaired group.

3DDT: 3D Detection Task, AFCT: Alternative Forced Choice Task, PMT: Perceptual Matching Task, PT: Position Task.
